# Supplementary material for: Automatic screening of antioxidants based on the evaluation of kinetics of suppression of chemiluminescence in a luminol–hydrogen peroxide system using a sequential injection analysis setup with a flow-batch detection cell
Source: Royal Society of Chemistry journal article supplement (doi:10.1039/c9ay00160c), 2019-01-01
Supplement: c9ay00160c1.pdf [file c9ay00160c1.pdf]

Table S1: Measurement steps

| action                                              | volume/direction                      | flow rate                  |
|-----------------------------------------------------|---------------------------------------|----------------------------|
| aspiration of water                                 | 100 µL/holding coil                   | 50 µL s <sup>-1</sup>      |
| aspiration of air                                   | 10 µL/holding coil                    | 30 µL s <sup>-1</sup>      |
| aspiration of hydrogen peroxide                     | 40 µL/holding coil                    | 30 µL s <sup>-1</sup>      |
| aspiration of air                                   | 10 µL/holding coil                    | 30 µL s <sup>-1</sup>      |
| aspiration of luminol                               | 40 µL/holding coil                    | 30 µL s <sup>-1</sup>      |
| aspiration of air                                   | 10 µL/holding coil                    | 30 µL s <sup>-1</sup>      |
| aspiration of hexacyanoferrate                      | 10 µL/holding coil                    | 30 µL s <sup>-1</sup>      |
| aspiration of air                                   | 10 µL/holding coil                    | 30 µL s <sup>-1</sup>      |
| aspiration of antioxidant (sample) or water (blank) | 50 µL/holding coil                    | 30 µL s <sup>-1</sup>      |
| aspiration of air                                   | 10 µL/holding coil                    | 30 µL s <sup>-1</sup>      |
| dispensing                                          | empty/detection cell                  | 50 µL s <sup>-1</sup>      |
| <b>stop-flow</b>                                    | <b>60 s/scanning of the CL signal</b> | <b>0 µL s<sup>-1</sup></b> |
| aspiration of reagent mixture                       | 300 µL/holding coil                   | 60 µL s <sup>-1</sup>      |
| dispensing                                          | empty/waste                           | 60 µL s <sup>-1</sup>      |
| aspiration of washing solvent (water)               | 500 µL/holding coil                   | 60 µL s <sup>-1</sup>      |
| dispensing                                          | 250 µL/detection cell                 | 50 µL s <sup>-1</sup>      |
| aspiration of the detection cell content            | 300 µL/holding coil                   | 60 µL s <sup>-1</sup>      |
| dispensing                                          | empty/waste                           | 60 µL s <sup>-1</sup>      |
